# Supplementary material for: The psychometric properties of a shortened Dutch version of the consequences scale used in the Core Alcohol and Drug Survey
Source: PLOS journal article supplement (doi:10.1371/journal.pone.0187876), 2017-12-07
Supplement: S1 (10.1371/journal.pone.0187876.s001) [file journal.pone.0187876.s001]

| Item |                                                                           |
|------|---------------------------------------------------------------------------|
| 1    | Had a hangover                                                            |
| 2    | Performed poorly on a test or important project                           |
| 3    | Been in trouble with police, residence hall, or other college authorities |
| 4    | Damaged property, pulled fire alarm, etc.                                 |
| 5    | Got into an argument or fight                                             |
| 6    | Got nauseated or vomited                                                  |
| 7    | Driven a car while under the influence (DUI)                              |
| 8    | Missed a class                                                            |
| 9    | Been criticized by someone I know                                         |
| 10   | Thought I might have a drinking or other drug problem                     |
| 11   | Had a memory loss                                                         |
| 12   | Done something I later regretted                                          |
| 13   | Been arrested for DWI/DUI                                                 |
| 14   | Have been taken advantage of sexually                                     |
| 15   | Have taken advantage of another sexually                                  |
| 16   | Tried unsuccessfully to stop using                                        |
| 17   | Seriously thought about suicide                                           |
| 18   | Seriously tried to commit suicide                                         |
| 19   | Been hurt or injured                                                      |
